# Supplementary material
Source: Springer Nature journal article supplement (https://www.springermedizin.de/resource/supplementary/12885_2012_3774_MOESM3_ESM.pdf/9464414)
Supplement: MOESM3 [file 9464414]

|                                             | Time after surgery |          |          |     |         |         |         |     |         |         |         |     |         |         |         |     |         |         |         |     |
|---------------------------------------------|--------------------|----------|----------|-----|---------|---------|---------|-----|---------|---------|---------|-----|---------|---------|---------|-----|---------|---------|---------|-----|
|                                             | 3 months           | 6 months | 9 months | 1 y | 1 y 3 m | 1 y 6 m | 1 y 9 m | 2 y | 2 y 3 m | 2 y 6 m | 2 y 9 m | 3 y | 3 y 3 m | 3 y 6 m | 3 y 9 m | 4 y | 4 y 3 m | 4 y 6 m | 4 y 9 m | 5 y |
| Hospital visit<br>General/Clinical findings | ●                  | ●        | ●        | ●   | ●       | ●       | ●       | ●   | ●       | ●       | ●       | ●   |         | ●       |         | ●   |         | ●       |         | ●   |
| Tumor marker<br>(CEA, CA19-9)               | ●                  | ●        | ●        | ●   | ●       | ●       | ●       | ●   | ●       | ●       | ●       | ●   |         | ●       |         | ●   |         | ●       |         | ●   |
| Abdominal CT                                |                    | ●        |          | ●   |         | ●       |         | ●   |         | ●       |         | ●   |         | ●       |         | ●   |         | ●       |         | ●   |
| Chest CT                                    |                    | ●        |          | ●   |         | ●       |         | ●   |         | ●       |         | ●   |         | ●       |         | ●   |         | ●       |         | ●   |
| Colonoscopy                                 | *                  |          |          | ●   |         |         |         |     |         |         |         | ●   |         |         |         |     |         |         |         |     |

\* : To be performed if preoperative examinations of the proximal colon are inadequate.
